# Supplementary material for: Normalizing the brain connectome for communication through synchronization
Source: PubMed Central journal article supplement (PMC9810372; doi:10.1162/netn_a_00231), 2022-07-01
Supplement: netn-06-722-s001.pdf [file netn-06-722-s001.pdf]

1 Supplemental Material for

2

3 **Normalizing the brain connectome for communication through**  
4 **synchronization**

5 S Petkoski, VK Jirsa.

6

7 Correspondence to: [spase.petkoski@univ-amu.fr](mailto:spase.petkoski@univ-amu.fr) & [viktor.jirsa@univ-amu.fr](mailto:viktor.jirsa@univ-amu.fr)

8

9 **This document includes:**

10 Figure S1

11 Tables S1 to S15

12

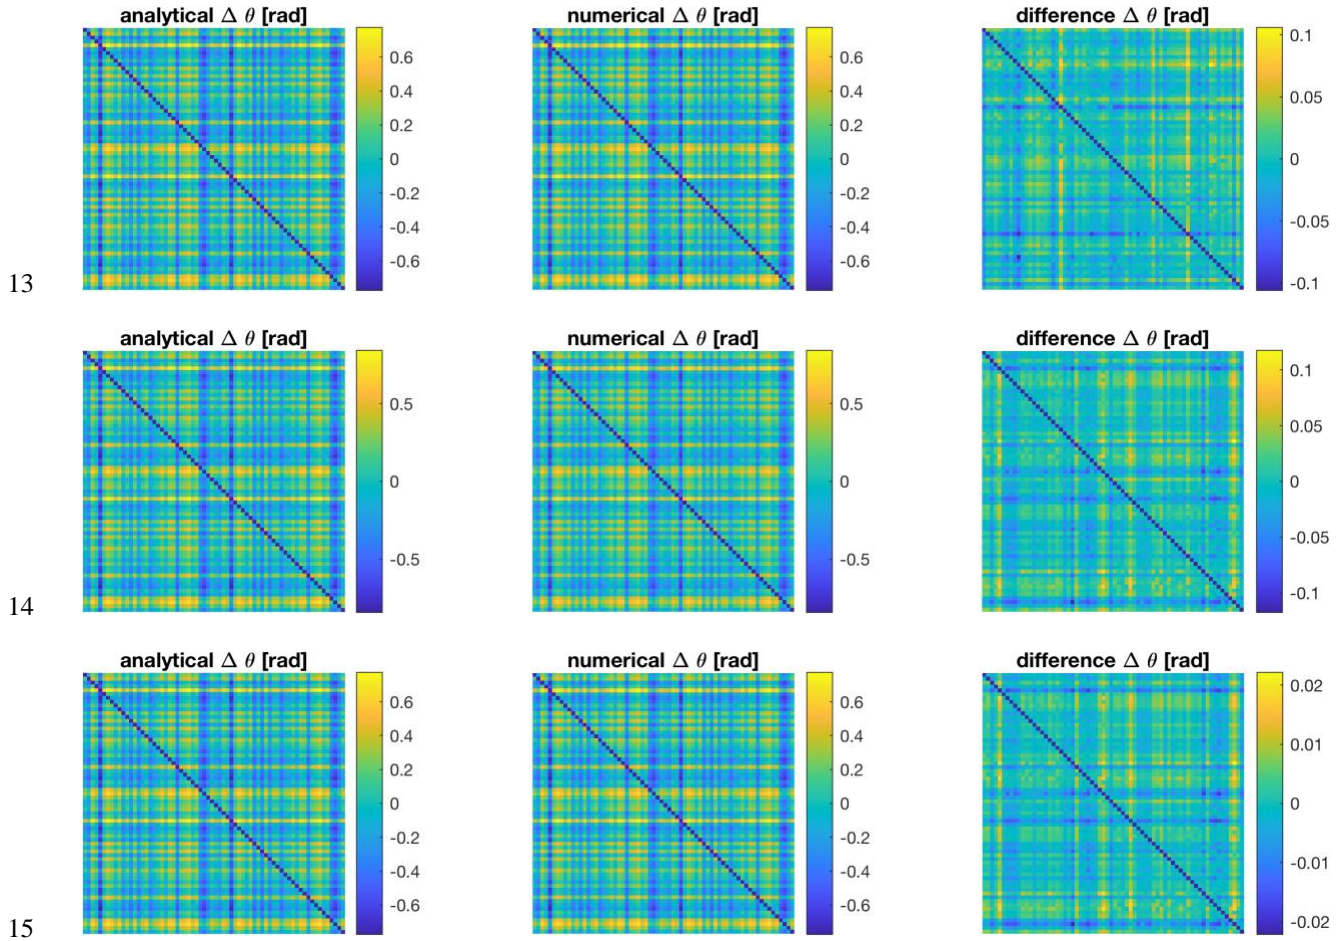

16 **Fig. S1.** Analytical (Eq. 3) and numerical results for the phase difference between each pair of  
 17 brain regions of a single subject, for simulation of the Kuramoto model with (upper row) time step  
 18  $dt=0.0005$  and noise intensity  $D=0$ , (middle row)  $dt=0.0001$  and  $D=0.2$ , and (bottom row)  
 19  $dt=0.0001$  and  $D=.$  A constant weight of 0.01 is added to all the weights of the connectome, so  
 20 that all the nodes are synchronized, while preserving the heterogeneity. Parameters:  $f=10\text{Hz}$ ,  
 21  $v=3.3\text{m/s}$ ,  $G=3$ .

| <b>delta</b>    | <b>Visual</b> | <b>SensMot</b> | <b>Auditory</b> | <b>ExecCont</b> | <b>FronPar</b> |
|-----------------|---------------|----------------|-----------------|-----------------|----------------|
| <b>DMN</b>      | 9.4e-9        | 2.4e-41        | 2.85e-16        | 0.14            | 0.21           |
| <b>Visual</b>   | -             | 1.7e-55        | 4.5e-32         | 3.1e-05         | 2.37e-07       |
| <b>SensMot</b>  | -             | -              | 1.1e-13         | 7.7e-43         | 5.5e-49        |
| <b>Auditory</b> | -             | -              | -               | 6.6e-19         | 6.7e-22        |
| <b>ExecCont</b> | -             | -              | -               | -               | 0.67           |

22 **Table S1.** p values of the t-test for the null hypothesis that the normalized spectral content in the  
23 delta frequency band in different RSNs comes from independent random samples from normal  
24 distributions with equal means and equal but unknown variances.

25

| <b>theta</b>    | <b>Visual</b> | <b>SensMot</b> | <b>Auditory</b> | <b>ExecCont</b> | <b>FronPar</b> |
|-----------------|---------------|----------------|-----------------|-----------------|----------------|
| <b>DMN</b>      | 5.5e-05       | 8.1e-34        | 2.3e-19         | 9.7e-13         | 3.5e-34        |
| <b>Visual</b>   | -             | 6.4e-41        | 1.2e-27         | 6.3e-20         | 1.3e-14        |
| <b>SensMot</b>  | -             | -              | 9.1e-05         | 2.8e-04         | 1.7e-73        |
| <b>Auditory</b> | -             | -              | -               | 0.70            | 4.9e-59        |
| <b>ExecCont</b> | -             | -              | -               | -               | 4.6e-43        |

26 **Table S2.** p values of the t-test for the null hypothesis that the normalized spectral content in the  
27 theta frequency band in different RSNs comes from independent random samples from normal  
28 distributions with equal means and equal but unknown variances.

29

30

| <b>alpha</b>    | <b>Visual</b> | <b>SensMot</b> | <b>Auditory</b> | <b>ExecCont</b> | <b>FronPar</b> |
|-----------------|---------------|----------------|-----------------|-----------------|----------------|
| <b>DMN</b>      | 7.6e-101      | 2.1e-75        | 9.4e-30         | 0.53            | 2.4e-56        |
| <b>Visual</b>   | -             | 4.7e-144       | 7.0e-82         | 2.8e-84         | 5.3e-16        |
| <b>SensMot</b>  | -             | -              | 6.1e-107        | 2.4e-60         | 2.3e-107       |
| <b>Auditory</b> | -             | -              | -               | 1.0e-22         | 2.2e-30        |
| <b>ExecCont</b> | -             | -              | -               | -               | 1.98e-49       |

31 **Table S3.** p values of the t-test for the null hypothesis that the normalized spectral content in the  
32 alpha frequency band in different RSNs comes from independent random samples from normal  
33 distributions with equal means and equal but unknown variances.

34

| <b>beta</b>     | <b>Visual</b> | <b>SensMot</b> | <b>Auditory</b> | <b>ExecCont</b> | <b>FronPar</b> |
|-----------------|---------------|----------------|-----------------|-----------------|----------------|
| <b>DMN</b>      | 5.4e-05       | 2.1e-35        | 1.9e-56         | 1.6e-06         | 4.0e-4         |
| <b>Visual</b>   | -             | 3.3e-26        | 4.6e-45         | 1.26e-15        | 7.3e-15        |
| <b>SensMot</b>  | -             | -              | 0.40            | 2.2e-44         | 7.5e-47        |
| <b>Auditory</b> | -             | -              | -               | 2.1e-63         | 2.47e-76       |
| <b>ExecCont</b> | -             | -              | -               | -               | 2.0e-2         |

35 **Table S4.** p values of the t-test for the null hypothesis that the normalized spectral content in the  
36 beta frequency band in different RSNs comes from independent random samples from normal  
37 distributions with equal means and equal but unknown variances.

38

| <b>low gamma</b> | <b>Visual</b> | <b>SensMot</b> | <b>Auditory</b> | <b>ExecCont</b> | <b>FronPar</b> |
|------------------|---------------|----------------|-----------------|-----------------|----------------|
| <b>DMN</b>       | 3.1e-3        | 2.5e-2         | 2.5e-22         | 0.19            | 9.0e-18        |
| <b>Visual</b>    | -             | 0.86           | 4.03e-31        | 4.4e-4          | 1.0e-10        |
| <b>SensMot</b>   | -             | -              | 2.5e-24         | 3.0e-3          | 4.4e-08        |
| <b>Auditory</b>  | -             | -              | -               | 7.4e-13         | 2.8e-47        |
| <b>ExecCont</b>  | -             | -              | -               | -               | 5.2e-15        |

39 **Table S5.** p values of the t-test for the null hypothesis that the normalized spectral content in the  
40 low gamma frequency band in different RSNs comes from independent random samples from  
41 normal distributions with equal means and equal but unknown variances.

42

| <b>gamma</b>    | <b>Visual</b> | <b>SensMot</b> | <b>Auditory</b> | <b>ExecCont</b> | <b>FronPar</b> |
|-----------------|---------------|----------------|-----------------|-----------------|----------------|
| <b>DMN</b>      | 2.6e-08       | 7.3e-21        | 3.7e-14         | 9.4e-09         | 1.9e-2         |
| <b>Visual</b>   | -             | 2.1e-31        | 3.9e-2          | 0.67            | 6.0e-4         |
| <b>SensMot</b>  | -             | -              | 4.3e-37         | 3.2e-31         | 7.4e-25        |
| <b>Auditory</b> | -             | -              | -               | 0.12            | 3.6e-08        |
| <b>ExecCont</b> | -             | -              | -               | -               | 2.0e-4         |

43 **Table S6.** p values of the t-test for the null hypothesis that the normalized spectral content in the  
44 gamma frequency band in different RSNs comes from independent random samples from normal  
45 distributions with equal means and equal but unknown variances.

46



| <b>DMN</b>       | <b>theta</b> | <b>alpha</b> | <b>beta</b> | <b>low gamma</b> | <b>gamma</b> |
|------------------|--------------|--------------|-------------|------------------|--------------|
| <b>delta</b>     | 0.11         | 1.1e-30      | 2.3e-15     | 2.2e-2           | 5.6e-4       |
| <b>theta</b>     | -            | 1.8e-34      | 1.9e-11     | 0.38             | 0.057        |
| <b>alpha</b>     | -            | -            | 3.0e-49     | 1.0e-32          | 6.1e-39      |
| <b>beta</b>      | -            | -            | -           | 8.5e-08          | 2.4e-07      |
| <b>low gamma</b> | -            | -            | -           | -                | 0.43         |

47 **Table S7.** p values of the t-test for the null hypothesis that the normalized spectral content in the  
48 Default Mode Network in different frequencies comes from independent random samples from  
49 normal distributions with equal means and equal but unknown variances.

| <b>Visual</b>    | <b>theta</b> | <b>alpha</b> | <b>beta</b> | <b>low gamma</b> | <b>gamma</b> |
|------------------|--------------|--------------|-------------|------------------|--------------|
| <b>delta</b>     | 8.3e-03      | 3.6e-95      | 4.3e-18     | 8.2e-06          | 4.7e-02      |
| <b>theta</b>     | -            | 2.4e-84      | 1.6e-09     | 9.4e-02          | 0.66         |
| <b>alpha</b>     | -            | -            | 4.3e-72     | 3.5e-83          | 3.2e-80      |
| <b>beta</b>      | -            | -            | -           | 2.9e-06          | 1.6e-09      |
| <b>low gamma</b> | -            | -            | -           | -                | 4.5e-02      |

51 **Table S8.** p values of the t-test for the null hypothesis that the normalized spectral content in the  
52 Visual network in different frequencies comes from independent random samples from normal  
53 distributions with equal means and equal but unknown variances.

| <b>SensMot</b>   | <b>theta</b> | <b>alpha</b> | <b>beta</b> | <b>low gamma</b> | <b>gamma</b> |
|------------------|--------------|--------------|-------------|------------------|--------------|
| <b>delta</b>     | 0.76         | 6.1e-127     | 3.2e-53     | 4.6e-29          | 0.88         |
| <b>theta</b>     | -            | 1.2e-124     | 1.7e-51     | 1.7e-27          | 0.92         |
| <b>alpha</b>     | -            | -            | 1.5e-68     | 6.5e-91          | 1.9e-112     |
| <b>beta</b>      | -            | -            | -           | 5.8e-13          | 9.2e-45      |
| <b>low gamma</b> | -            | -            | -           | -                | 8.0e-23      |

55 **Table S9.** p values of the t-test for the null hypothesis that the normalized spectral content in the  
56 Sensory Motor network in different frequencies comes from independent random samples from  
57 normal distributions with equal means and equal but unknown variances.

58

| <b>Auditory</b>  | <b>theta</b> | <b>alpha</b> | <b>beta</b> | <b>low gamma</b> | <b>gamma</b> |
|------------------|--------------|--------------|-------------|------------------|--------------|
| <b>delta</b>     | 2.5e-03      | 7.7e-14      | 3.7e-59     | 2.6e-10          | 8.1e-27      |
| <b>theta</b>     | -            | 6.47e-21     | 7.0e-63     | 1.6e-04          | 4.8e-33      |
| <b>alpha</b>     | -            | -            | 9.5e-35     | 1.5e-28          | 1.4e-07      |
| <b>beta</b>      | -            | -            | -           | 7.8e-64          | 3.6e-12      |
| <b>low gamma</b> | -            | -            | -           | -                | 4.6e-39      |

59 **Table S10.** p values of the t-test for the null hypothesis that the normalized spectral content in the  
60 Auditory network in different frequencies comes from independent random samples from normal  
61 distributions with equal means and equal but unknown variances.

| <b>ExecCont</b>  | <b>theta</b> | <b>alpha</b> | <b>beta</b> | <b>low gamma</b> | <b>gamma</b> |
|------------------|--------------|--------------|-------------|------------------|--------------|
| <b>delta</b>     | 4.8e-18      | 2.5e-19      | 3.9e-30     | 1.2e-4           | 4.1e-02      |
| <b>theta</b>     | -            | 1.5e-37      | 2.2e-02     | 5.8e-05          | 7.6e-20      |
| <b>alpha</b>     | -            | -            | 4.3e-47     | 4.3e-23          | 1.6e-12      |
| <b>beta</b>      | -            | -            | -           | 5.3e-10          | 3.3e-30      |
| <b>low gamma</b> | -            | -            | -           | -                | 7.6e-07      |

63 **Table S11.** p values of the t-test for the null hypothesis that the normalized spectral content in the  
64 Executive Control network in different frequencies comes from independent random samples from  
65 normal distributions with equal means and equal but unknown variances.

66

| <b>FronPar</b>   | <b>theta</b> | <b>alpha</b> | <b>beta</b> | <b>low gamma</b> | <b>gamma</b> |
|------------------|--------------|--------------|-------------|------------------|--------------|
| <b>delta</b>     | 5.1e-30      | 6.8e-36      | 4.3e-41     | 2.9e-13          | 4.6e-02      |
| <b>theta</b>     | -            | 1.1e-55      | 1.2e-75     | 1.8e-02          | 3.1e-27      |
| <b>alpha</b>     | -            | -            | 2.9e-09     | 2.3e-46          | 5.6e-29      |
| <b>beta</b>      | -            | -            | -           | 4.4e-52          | 5.6e-25      |
| <b>low gamma</b> | -            | -            | -           | -                | 9.2e-15      |

67 **Table S12.** p values of the t-test for the null hypothesis that the normalized spectral content in the  
68 Frontal Parietal network in different frequencies comes from independent random samples from  
69 normal distributions with equal means and equal but unknown variances.

70

| <b>Frequency bands</b> | <b>delta</b> | <b>theta</b> | <b>alpha</b> | <b>beta</b> | <b>low gamma</b> | <b>gamma</b> |
|------------------------|--------------|--------------|--------------|-------------|------------------|--------------|
| <b>freq. [Hz]</b>      | 1-4          | 4-8          | 8-13         | 13-30       | 30-50            | 50-80        |

71 **Table S13.** EEG frequency band

| <b>Lobes</b>     | <b>Regions</b>                                                                                                                                                                                |
|------------------|-----------------------------------------------------------------------------------------------------------------------------------------------------------------------------------------------|
| <b>Frontal</b>   | caudalmiddlefrontal, lateralorbitofrontal, medialorbitofrontal, paracentral, parsopercularis, parsorbitalis, parstriangularis, precentral, rostralmiddlefrontal, superiorfrontal, frontalpole |
| <b>Cingulate</b> | caudalanteriorcingulate, isthmuscingulate, posteriorcingulate, rostralanteriorcingulate                                                                                                       |
| <b>Parietal</b>  | inferiorparietal, postcentral, precuneus, superiorparietal, supramarginal                                                                                                                     |
| <b>Temporal</b>  | bankssts, entorhinal, fusiform, inferior temporal, middletemporal, parahippocampal, superior temporal, temporalpole, transversetemporal, insula                                               |
| <b>Occipital</b> | cuneus, lateraloccipital, lingual, pericalcarine                                                                                                                                              |

72 Table S14. Brain regions of different lobes with same ordering as in Figs. Fig. 2 (B) and 3.

| <b>Restion<br/>State<br/>Networks</b> | <b>Regions</b>                                                                                                                                 |
|---------------------------------------|------------------------------------------------------------------------------------------------------------------------------------------------|
| <b>DMN</b>                            | inferiorparietal, isthmuscingulate, medialorbitofrontal, posteriorcingulate, precuneus, frontopole                                             |
| <b>Visual</b>                         | cuneus, fusiform, lateraloccipital, lingual, pericalcarine, precuneus                                                                          |
| <b>Sensory<br/>Motor</b>              | paracentral, postcentral, posteriorcingulate, precentral, paracentral                                                                          |
| <b>Auditory</b>                       | bankssts, parstriangularis, superior temporal, transversetemporal, insula                                                                      |
| <b>Executive<br/>Control</b>          | caudalanteriorcingulate, rostralanteriorcingulate, rostralmiddlefrontal                                                                        |
| <b>Frontal<br/>Parietal</b>           | caudalmiddlefrontal, inferiorparietal, parsopercularis, parsorbitalis, parstriangularis, rostralmiddlefrontal, superiorparietal, supramarginal |

73 Table S15. Brain regions of different Resting State Networks (RSNs).

74

75
